# Supplementary material for: Targeted proteomic approach for quantification of Collagen type I and type III in formalin-fixed paraffin-embedded tissue
Source: Research Square preprint supplement (doi:10.21203/rs.3.rs-4018449/v1), 2024-04-11
Supplement: Supplementary file 1 [file 2d4e622dbcc356c951664f0c.xlsx]

## Sheet: MRM Parameters
protein.name	peptide.seq	Localization	precursor.retT	charge state	precursor.mz	product.m_z	collision_energy	cone_voltage	ion_name	Ratio	FW (g/mol)
sp|P02452|CO1A1_HUMAN	GPAGPQGPR	1085-1093	1.65	2+	418.72	611.326	15	35	y6	Quantifier	835.9
sp|P02452|CO1A1_HUMAN	GPAGPQGPR				418.72	554.3	15	35	y5	1.6076
sp|P02452|CO1A1_HUMAN	GPAGPQGPR				418.72	682.363	15	35	y7	1.12
sp|P02452|CO1A1_HUMAN	GPAGP*QGP*R	1085-1093	0.91	2+	434.717	643.3	15	35	y6	0.834
sp|P02452|CO1A1_HUMAN	GPAGP*QGP*R				434.717	345.2	15	35	y3
sp|P02452|CO1A1_HUMAN	GPAGP*QGP*R				434.717	714.4	15	35	y7	Quantifier
sp|P02452|CO1A1_HUMAN	GPAGPQGPR^	1085-1093	1.645	2+	423.73	621.334	15	35	y6	Quantifier	845.9
sp|P02452|CO1A1_HUMAN	GPAGPQGPR^				423.73	564.313	15	35	y5	1.1
sp|P02452|CO1A1_HUMAN	GPAGPQGPR^				423.73	692.371	15	35	y7	1.498
sp|P02461|CO3A1_HUMAN	GPVGPSGPPGK	1140-1150	2.345	2+	475.26	696.368	18	35	y8	Quantifier	949.1
sp|P02461|CO3A1_HUMAN	GPVGPSGPPGK				475.26	639.346	18	35	y7	2.252
sp|P02461|CO3A1_HUMAN	GPVGPSGP*PGK	1140-1150	1.92	2+	483.256	712.4	18	35	y8	Quantifier
sp|P02461|CO3A1_HUMAN	GPVGPSGP*PGK				483.256	471.3	18	35	y5	8.844
sp|P02461|CO3A1_HUMAN	GPVGPSGP*PGK				483.256	414.2	18	35	y4
sp|P02461|CO3A1_HUMAN	GPVGPSGPPGK^	1140-1150	2.335	2+	479.27	704.382	18	35	y8	Quantifier	957.1
sp|P02461|CO3A1_HUMAN	GPVGPSGPPGK^				479.27	647.36	18	35	y7	2.077
		protein.name	peptide.seq	charge state
		sp|P02452|CO1A1_HUMAN	GPAGPQGPR	2+
		sp|P02452|CO1A1_HUMAN	GPAGP*QGP*R	2+
		sp|P02461|CO3A1_HUMAN	GPVGPSGPPGK	2+
		sp|P02461|CO3A1_HUMAN	GPVGPSGP*PGK	2+

## Sheet: Reindeer Atlas Gene Expresion
From: http://www.biernaskielab.ca/reindeer_atlas/
Average Expression Data
	P4HB									P4HA1 (Up in melanoma)
	Day0 Back	Day0 Velvet	Day3 Back	Day3 Velvet	Day7 Back	Day7 Velvet	Day14 Back	Day14 Velvet		Day0 Back	Day0 Velvet	Day3 Back	Day3 Velvet	Day7 Back	Day7 Velvet	Day14 Back	Day14 Velvet
Arterial Endothelial	1.77	1.86	4.97	3.3	3.83	3.58	2.27	3.57		0.32	0.39	0.51	0.5	0.39	0.52	0.47	0.49
Basal Keratinocyte	1.59	1.62	2.79	2.56	3.52	1.99	1.75	2.5		0.13	0.19	0.2	0.18	0.25	0.16	0.19	0.2
B-cell	1.91	2.95	4.11	3.95	2.74	9.1	2.44	9.23		1.37	0	0.45	0	0.54	0	0.17	0.18
CD45+Leukocyte	1.54	1.51	0.66	1.04	1.51	1.21	1.38	2.02		0.13	0.34	0	0.65	0	0.18	0	0.85
CD68+CSF1R+Macrophage	1.57	1.74	1.99	2.21	1.8	1.78	1.59	2.62		0.29	0.56	0.5	0.45	0.45	0.53	0.47	0.4
CD68+NOS+Macrophage	0.75	0.82	1.01	1.04	1.6	1.07	0.85	1.77		0	0.13	0.31	0.33	0.76	0.7	0.38	0.35
CD8+T-cell	3.54	5.98	6.87	6.76	8.36	7.46	5.69	10.01		0	0.62	0.78	0.53	0.56	0.27	0.3	0.15
S100A8/A9+CSF3R+Neutrophil	0	0	0.84	1.48	1.41	1.33	0	2.05		0	0	0.34	0.37	1.06	1.08	0	4.92
Fibroblast	3.07	4.49	6.12	6.04	8.26	6.82	4.2	6.43		0.65	0.72	0.9	0.72	1.34	1.05	0.75	0.84
Lymphatic Endothelial	1.83	2.97	4.97	3.52	4.82	3.29	2.47	3.9		0.37	0.45	0.28	0.52	0.39	0.21	0.3	0.24
Melanocyte	2.61	3.05	2.5	4.11	3.34	1.94	3.23	4.64		0.36	0.44	0.39	0.43	0.43	0.62	0.26	0.49
Schwann	1.35	0.76	4.05	2.4	2.02	0	0.67	4.76		1.07	0	0.46	0.5	0.41	0	0.35	0.46
Suprabasal Keratinocyte	2.32	2.12	3.04	2.67	2.11	2.17	1.96	3.02		0.05	0.12	0.25	0.1	0.16	0.06	0.1	0.13
T-cell	1.41	1.37	2.41	2.09	1.7	1.7	1.72	2.11		0.09	0.19	0.16	0.26	0.14	0.17	0.33	0.33
VSM	2.05	2.9	4.83	4.28	3.12	4.37	1.89	3.89		0.41	0.59	0.84	0.52	0.71	0.77	0.33	0.64
	P4HA2									P4HA3
	Day0 Back	Day0 Velvet	Day3 Back	Day3 Velvet	Day7 Back	Day7 Velvet	Day14 Back	Day14 Velvet		Day0 Back	Day0 Velvet	Day3 Back	Day3 Velvet	Day7 Back	Day7 Velvet	Day14 Back	Day14 Velvet
Arterial Endothelial	0.34	0.83	1.14	0.9	0.7	1.24	0.72	0.81		0.02	0.03	0.01	0.01	0	0	0	0.01
Basal Keratinocyte	0.95	0.64	1.42	0.98	1.89	1.14	1.13	1.02		0	0.04	0	0.02	0	0.01	0	0.01
B-cell	0.3	0.31	0.26	0	1.39	0	1.08	0.21		0	0	0	0	0.2	0	0	0
CD45+Leukocyte	0.16	0.29	0	0.17	0.41	0.09	0.19	0.3		0	0	0	0.03	0	0	0	0
CD68+CSF1R+Macrophage	0.31	0.34	1.11	0.76	0.64	0.79	0.53	0.72		0	0.04	0	0.01	0	0	0	0.01
CD68+NOS+Macrophage	0.17	0.56	1.22	0.77	0.9	0.72	0.74	0.93		0	0	0.01	0	0	0.01	0	0
CD8+T-cell	0	1.14	0.3	0.26	0.13	0.12	0.17	0.06		0	0	0	0	0	0	0	0
S100A8/A9+CSF3R+Neutrophil	0	0	0.41	0.32	0.33	0.36	0	4.21		0	0	0.02	0.02	0.02	0.02	0	0
Fibroblast	2.59	3.33	2.97	3.65	6.33	5.41	5.29	4.15		0.39	1.62	0.52	0.91	0.41	0.55	0.71	1.07
Lymphatic Endothelial	1.75	2.62	1.57	2.64	2.55	1.4	1.11	2.55		0	0.01	0.03	0.04	0.02	0.01	0.02	0.01
Melanocyte	2.14	2.22	2.16	4.03	1.64	3.16	1.31	2.5		0	0.01	0	0	0	0	0	0
Schwann	0.77	3.18	1.19	2.08	2.57	0	0	0.38		0	0	0	0	0	0	0	0
Suprabasal Keratinocyte	0.32	0.38	0.9	0.67	1.33	1.04	0.45	0.85		0	0	0	0.01	0	0	0.01	0.01
T-cell	0.86	1.02	1.36	1.29	0.52	0.73	0.63	1.16		0	0.01	0	0	0	0	0	0
VSM	0.71	1.13	2.15	2.18	2.17	3.7	1.89	1.88		0	0.04	0.03	0.07	0.25	0.12	0.1	0.07
	P4HATM (transmembrane)
	Day0 Back	Day0 Velvet	Day3 Back	Day3 Velvet	Day7 Back	Day7 Velvet	Day14 Back	Day14 Velvet
Arterial Endothelial	0.16	0.11	0.04	0.07	0.03	0.04	0.08	0.05
Basal Keratinocyte	0.05	0.09	0.07	0.05	0.04	0.05	0.04	0.06
B-cell	0.53	0	0	0	0	0	0	0
CD45+Leukocyte	0	0.04	0	0	0	0	0	0
CD68+CSF1R+Macrophage	0.03	0.02	0.03	0.03	0.03	0.05	0.04	0.07
CD68+NOS+Macrophage	0	0	0.01	0.01	0.01	0.01	0.05	0
CD8+T-cell	0	0.34	0	0.15	0.06	0	0.14	0.19
S100A8/A9+CSF3R+Neutrophil	0	0	0	0.03	0	0.02	0	0
Fibroblast	0.19	0.15	0.11	0.12	0.04	0.1	0.11	0.1
Lymphatic Endothelial	0.17	0.12	0.03	0.09	0.12	0.06	0.1	0
Melanocyte	0.01	0.04	0.07	0.05	0.13	0.13	0.53	0.11
Schwann	0.13	0	0.13	0.44	0.24	0	0	0
Suprabasal Keratinocyte	0.03	0.06	0.05	0.08	0.05	0.03	0.14	0.1
T-cell	0.05	0.05	0.04	0.06	0.01	0.02	0.05	0.06
VSM	0.13	0.08	0.06	0.13	0	0.06	0.24	0.05

## Sheet: DigestTime_Antler
							CO1A1		CO1A1		CO1A1		CO1A1			CO1A1					CO3A1
						Time (min)	Area	Norm Response	Area	Norm Response	Area	Norm Response	Area	Norm Response		Area Avg	Time (min)	Mean Norm Response	SD Norm Response		Area Avg	Time (min)	Mean Norm Response	SD Norm Response
						10	851656	0.313895	782572	0.290969	840800	0.286776	822147	0.287474		824294	10	0.294779	0.0128759		9218	10	0.0522626	0.0041538
						30	2229191	0.821614	2139268	0.795403	2294811	0.782703	2275329	0.795597		2.23465e+06	30	0.798829	0.0163442		41806	30	0.237298	0.00693711
						60	2368784	0.873064	2290994	0.851816	2585363	0.881803	2547018	0.890596		2.44804e+06	60	0.87432	0.0166224		64993.5	60	0.369455	0.00573798
						120	2458143	0.905999	2375467	0.883224	2668674	0.910219	2669469	0.933413		2.54294e+06	120	0.908214	0.020562		101307	120	0.575581	0.0119061
						240	2527633	0.931611	2469974	0.918363	2745449	0.936405	2738992	0.957722		2620512	240	0.936025	0.0163538		134551	240	0.766398	0.0146037
						300	2674348	0.985686	2633548	0.979182	2925362	0.997769	2897340	1.01309		2.79863e+06	960	1	0		175848	960	1	0
						960	2713184	1	2689540	1	2931904	1	2859902	1		2.96235e+06	1080	1.05829	0.00779793		186134	1080	1.05942	0.0141733
						1080	2869017	1.05744	2817495	1.04758	3120228	1.06423	3042674	1.06391		2.93558e+06	1200	1.04828	0.0229677		181309	1200	1.03311	0.0255389
						1200	2830760	1.04334	2737505	1.01783	3129823	1.06751	3044227	1.06445
							CO3A1		CO3A1		CO3A1		CO3A1
						Time (min)	Area	Norm Response	Area	Norm Response	Area	Norm Response	Area	Norm Response
						10	10996	0.0554315	9724	0.0508604	8924	0.0557492	7228	0.0470092
						30	48112	0.242535	45651	0.238773	38535	0.240732	34926	0.227151			Time (min)	COL III/ COL I + III (%)	SD
						60	74792	0.377031	69432	0.363157	59145	0.369485	56605	0.368146			10	0.00804743	3.44009e-05
						120	117586	0.592758	108093	0.56537	91725	0.573016	87823	0.57118			30	0.00968336	0.000140421
						240	149813	0.755216	144051	0.753444	125457	0.783744	118883	0.773188			60	0.0129182	0.000126652
						300	166880	0.841252	156139	0.816669	138534	0.865437	128177	0.833634			120	0.0182272	0.00071151
						960	198371	1	191190	1	160074	1	153757	1			240	0.0232416	0.000608442
						1080	209996	1.0586	198922	1.04044	171935	1.0741	163683	1.06456			960	0.0279849	0.000434084
						1200	200536	1.01091	195259	1.02128	165010	1.03084	164432	1.06943			1080	0.0277862	0.00050652
																	1200	0.0283541	0.000338486
						Time (min)	C3/CTOT	C3/CTOT	C3/CTOT	Mean	SD
						10	0.00800771	0.0080673	0.0080673	0.00804743	3.44009e-05
						30	0.00952121	0.00976443	0.00976443	0.00968336	0.000140421
						60	0.0127719	0.0129913	0.0129913	0.0129182	0.000126652
	Antler Tissue Digested with 1.0 µg trypsin					120	0.0190487	0.0178164	0.0178164	0.0182272	0.00071151
	4XE Antler A(8)					240	0.0239442	0.0228903	0.0228903	0.0232416	0.000608442
						300	0.024914	0.0234747	0.0234747	0.0239544	0.000831031
						960	0.0284862	0.0277343	0.0277343	0.0279849	0.000434084
						1080	0.0283711	0.0274938	0.0274938	0.0277862	0.00050652
						1200	0.0279632	0.0285495	0.0285495	0.0283541	0.000338486

## Sheet: DigestTrypsinAmt_Skin
						Trypsin (µg)	COL III/Tot COL (%)	SD (%)	TP (µg)/mm2
						0.25	0.0515938	0.000615137	0.4
						0.5	0.0680866	0.000390122	0.474
						1	0.0743298	0.00158168	0.815
						2	0.0778523	0.00106335	0.8
						2.5	0.0771638	0.00419373	1.10667
						5	0.0693571	0.00268881	1.34
	Skin Tissue Digested overnight (17 hours), varied trypsin amount

## Sheet: ProteinYield
						Tissue	Yield (µg/mm2)	SD	N
						Antler	1.57105	0.605823	10
						Back	1.03458	0.414409	8
						Lung_HBE	1.70788	0.417842	5
						Lung_IPF	1.81457	0.60437	5
						Skin	0.81	0.115326	3
	Tissue Digested with 1.0 or 2.0 µg of trypsin overnight (17 hours)

## Sheet: C1C3HyP_Precision
	QC_Process_C1	QC_A_C1	QC_A_C3	QC_A_C3_HyP	QC_B_C1	QC_B_C3	QC_B_C3_HyP		Peptide		LOD (ng/mL)	LOQ (ng/mL)
	1373.87	300.769	15.806	18.717	469.481	88.068	30.528		COL1A1	GPAGPQGPR	0.037	0.1
	1141.26	291.923	14.785	17.487	462.789	85.337	29.614		COL3A1	GPVGPSGPPGK	0.063	0.07
	1223.63	299.41	15.252	16.539	465.831	86.332	29.764
	1489.12	298.01	14.791	17.572	455.839	84.103	29.456				Updated 221222
	1226.5	302.614	15.007	17.927	471.662	85.579	30.054
	1489.68	299.574	15.044	17.201	462.721	85.261	29.832
	1227.41	308.056	16.354	18.779	467.873	88.679	30.788
	1733.93	302.474	16.238	18.922	455.373	88.799	30.267
	1654.13	306.04	16.464	19.512	458.985	87.404	31.54
	1642.79	305.127	16.528	19.112	464.262	89.527	30.856
	1601.16	304.49	15.586	18.248	482.315	87.857	30.627
	1559.89	295.161	15.692	18.594	474.621	87.177	29.88
	1477.45	307.281	16.562	18.578	481.668	88.773	30.363
	1686.53	299.011	15.019	17.731	474.863	86.606	29.773
	1624.9	294.858	15.278	17.694	458.362	86.214	29.27
	1401.15	317.572	16.389	19.07	512.755	95.396	33.845
	1896.17	293.76	15.704	17.941	467.754	89.522	31.024
	1362.65	309.204	16.171	18.766	465.85	86.287	29.416
	1392.07	315.65	15.725	17.998	467.531	86.904	29.413
	1382.36	303.233	16.015	18.707	456.298	86.968	29.773
Mean	1479.33	302.711	15.7205	18.2547	468.842	87.5396	30.3042
SD	196.876	6.78921	0.605173	0.745858	12.9456	2.36891	1.03747
CV%	0.133084	0.022428	0.0384958	0.0408583	0.0276118	0.0270609	0.0342352
	Updated 230310

## Sheet: SampleSummary
			Tissue	Protein	Yield	CO1A1	CO3A1	CO3A1_HyP	CO1A1	CO3A1	CO3A1_HyP	C3/C3-HyP	COL I	COL III	COL TOT	COL III/TOT
Date	Tissue	Sample ID	mm2	µg	µg/mm2	ng/mL	ng/mL	ng/mL	nM	nM	nM		nM	nM	nM	%
2022-10-07	Back	FFPE_5XD_1B1L	30	19.89	0.663	1072.2	206.58	59.02	1282.69	217.659	61.1543	3.55918	641.345	92.9377	734.282	0.126569		Updated 230310
2022-10-07	Back	FFPE_5XD_1B2L	30	10.01	0.333667	607.92	112.58	29.7	727.264	118.618	30.774	3.85447	363.632	49.7972	413.429	0.120449
2022-10-07	Back	FFPE_5XD_2B1L	30	26.39	0.879667	1321.9	247.38	72.21	1581.41	260.647	74.8213	3.48359	790.705	111.823	902.527	0.1239
2022-10-07	Back	FFPE_5XD_2B2L	30	31.07	1.03567	1749.77	317.12	85.77	2093.28	334.127	88.8716	3.75966	1046.64	141	1187.64	0.118723
2022-10-07	Back	FFPE_5XD_2B3L	30	31.2	1.04	1533.31	288.06	80.83	1834.32	303.509	83.753	3.62385	917.161	129.087	1046.25	0.123381
2022-10-07	Antler	FFPE_5XD_8A1L	20	42.12	2.106	1673.39	89.63	97.34	2001.9	94.4368	100.86	0.936316	1000.95	65.0989	1066.05	0.0610656
2022-10-07	Antler	FFPE_5XD_8A2L	20	28.73	1.4365	1054.6	59.66	64.65	1261.63	62.8596	66.9879	0.938372	630.817	43.2825	674.1	0.0642078
2022-10-07	Antler	FFPE_5XD_8A3L	20	31.07	1.5535	1141.63	64.46	68.09	1365.75	67.917	70.5523	0.962648	682.875	46.1564	729.031	0.063312
2022-10-07	Antler	FFPE_5XD_10A1L	20	35.36	1.768	1195.47	66.41	72.98	1430.16	69.9716	75.6191	0.925316	715.08	48.5302	763.61	0.0635537
2022-10-07	Antler	FFPE_5XD_10A2L	20	1.3	0.065	89.49	5.44	6.04	107.058	5.73175	6.25842	0.915846	53.5291	3.99672	57.5259	0.069477
2022-10-07	Antler	FFPE_5XD_10A3L	20	34.45	1.7225	1218.74	68.88	72.82	1458	72.574	75.4533	0.96184	728.999	49.3424	778.341	0.0633944
2022-10-18	Back	FFPE_5XD_2B1R	30	37.7	1.25667	896.98	179.35	60.45	1073.07	188.968	62.636	3.01693	536.535	83.8682	620.404	0.135183
2022-10-18	Back	FFPE_5XD_2B2R	30	45.5	1.51667	1011.96	193	65.63	1210.62	203.351	68.0033	2.9903	605.312	90.4513	695.763	0.130003
2022-10-18	Back	FFPE_5XD_2B3R	30	46.54	1.55133	991.52	192.34	67.69	1186.17	202.655	70.1378	2.88939	593.085	90.931	684.016	0.132937
2022-10-18	Antler	FFPE_5XD_8A1R	20	46.8	2.34	832.75	45.31	52.39	996.232	47.74	54.2845	0.87944	498.116	34.0082	532.124	0.0639102
2022-10-18	Antler	FFPE_5XD_8A2R	20	27.04	1.352	531.57	27.65	32.17	635.925	29.1329	33.3333	0.873986	317.963	20.8221	338.785	0.061461
2022-10-18	Antler	FFPE_5XD_8A3R	20	32.76	1.638	601.47	31.47	36.3	719.548	33.1577	37.6127	0.881557	359.774	23.5901	383.364	0.0615346
2022-10-18	Antler	FFPE_5XD_10A3R	20	34.58	1.729	661.52	32.91	40.62	791.387	34.675	42.0889	0.82385	395.693	25.588	421.281	0.0607384
2022-11-24	Lung	FFPE_HBE95	47.9	54.04	1.12818	606.381	59.448	210.765	725.423	62.6362	218.387	0.286813	362.711	93.6743	456.386	0.205252
2022-11-24	Lung	FFPE_HBE97-1	38.1	61.88	1.62415	475.002	68.013	178.539	568.252	71.6605	184.995	0.387364	284.126	85.552	369.678	0.231423
2022-11-24	Lung	FFPE_HBE97-2	38.1	64.96	1.70499	599.37	85.443	208.746	717.036	90.0253	216.295	0.416216	358.518	102.107	460.624	0.22167
2022-11-24	Lung	FFPE_IPF007	57.2	129.36	2.26154	1162.71	290.832	287.382	1390.97	306.429	297.774	1.02907	695.486	201.401	896.887	0.224556
2022-11-24	Lung	FFPE_IPF008-1	81.2	101.78	1.25345	649.296	109.518	207.345	776.763	115.391	214.843	0.537096	388.381	110.078	498.46	0.220837
2022-11-24	Lung	FFPE_IPF008-2	81.2	99.96	1.23103	802.878	155.235	275.874	960.495	163.56	285.85	0.572189	480.248	149.803	630.051	0.237764
2022-11-29	Lung	FFPE_HBE95	47.9	85.4	1.78288	401.323	38.67	141.408	480.109	40.7439	146.522	0.278074	240.054	62.4218	302.476	0.206369
2022-11-29	Lung	FFPE_HBE97	38.1	87.6	2.29921	349.566	52.164	122.797	418.191	54.9615	127.238	0.43196	209.096	60.733	269.829	0.22508
2022-11-29	Lung	FFPE_IPF007	57.2	148.1	2.58916	542.787	146.721	145.515	649.344	154.59	150.777	1.02529	324.672	101.789	426.461	0.238683
2022-11-29	Lung	FFPE_IPF008	81.2	141.1	1.73768	501.043	101.008	180.464	599.405	106.425	186.99	0.569148	299.703	97.805	397.508	0.246046
2022-11-29	AntlerWound	FFPE_AW_5X-28_DMSO	70	62.4	0.891429	745.397	79.993	50.868	891.73	84.283	52.7075	1.59907	445.865	45.6635	491.528	0.092901
2022-11-29	AntlerWound	FFPE_AW_5X-48_iMDK	32	50.7	1.58438	800.577	88.64	50.842	957.743	93.3937	52.6806	1.77283	478.871	48.6914	527.563	0.0922951
2022-11-29	AntlerWound	FFPE_AW_5X-58_iMDK	30	27.6	0.92	375.894	45.4	28.53	449.688	47.8348	29.5617	1.61813	224.844	25.7988	250.643	0.102931
2022-11-29	AntlerWound	FFPE_AW_5X-15d9_UnTreat	40	44.8	1.12	656.785	75.661	45.545	785.722	79.7187	47.192	1.68924	392.861	42.3036	435.165	0.0972128
2022-12-14	AntlerWound	FFPE_3Y-2_DMSO	34	41.7	1.22647	858.308	85.836	66.355	1026.81	90.4394	68.7545	1.31539	513.404	53.0646	566.468	0.0936763
2022-12-14	AntlerWound	FFPE_5XD-L3_DMSO	39	31.2	0.8	531.312	52.191	37.996	635.617	54.99	39.37	1.39675	317.808	31.4533	349.262	0.0900566
2022-12-14	AntlerWound	FFPE_4XE-R3_DMSO	30	35.7	1.19	774.299	76.486	48.082	926.306	80.5879	49.8207	1.61756	463.153	43.4696	506.622	0.0858027
2022-12-14	AntlerWound	FFPE_5X-2_DMSO	60	48.6	0.81	603.62	68.885	46.377	722.12	72.5793	48.0541	1.51037	361.06	40.2111	401.271	0.100209
2022-12-14	AntlerWound	FFPE_3Y-4_iMDK	60	38.1	0.635	676.889	66.455	57.377	809.773	70.019	59.4519	1.17774	404.886	43.1569	448.043	0.0963232
2022-12-14	AntlerWound	FFPE_3Y-5_iMDK	30	16.8	0.56	254.64	24.452	18.046	304.63	25.7634	18.6986	1.37782	152.315	14.8206	167.136	0.0886744
2022-12-14	AntlerWound	FFPE_5XD-R6_iMDK	30	33.9	1.13	569.285	52.87	42.421	681.044	55.7054	43.955	1.26733	340.522	33.2201	373.742	0.0888852
2022-12-14	AntlerWound	FFPE_4XE-L4_iMDK	34	24.3	0.714706	400.445	49.242	30.971	479.058	51.8828	32.091	1.61674	239.529	27.9913	267.521	0.104632

## Sheet: SummaryGrouped
			Updated 230310	Tissue	Protein	Yield	CO1A1	CO3A1	CO3A1_HyP	CO1A1	CO3A1	CO3A1_HyP	C3/C3-HyP	COL I	COL III	COL III Hyp	COL III Total	COL TOT	COL III/TOT	COL III Hyp/TOT	COL III No Hyp/TOT
Date	Tissue	Matrix	Sample ID	mm2	µg	µg/mm2	ng/mL	ng/mL	ng/mL	nM	nM	nM		nM	nM	nM	nM	nM	%	%	%
2022-10-07	Back	Back	FFPE_5XD_1B1L	30	19.89	0.663	1072.2	206.58	59.02	1282.69	217.659	61.1543	3.55918	641.345	72.5529	20.3848	92.9377	734.282	0.126569	0.0277615	0.098808
2022-10-07	Back	Back	FFPE_5XD_1B2L	30	10.01	0.333667	607.92	112.58	29.7	727.264	118.618	30.774	3.85447	363.632	39.5392	10.258	49.7972	413.429	0.120449	0.024812	0.0956372
2022-10-07	Back	Back	FFPE_5XD_2B1L	30	26.39	0.879667	1321.9	247.38	72.21	1581.41	260.647	74.8213	3.48359	790.705	86.8823	24.9404	111.823	902.527	0.1239	0.027634	0.0962656
2022-10-07	Back	Back	FFPE_5XD_2B2L	30	31.07	1.03567	1749.77	317.12	85.77	2093.28	334.127	88.8716	3.75966	1046.64	111.376	29.6239	141	1187.64	0.118723	0.0249435	0.0937792
2022-10-07	Back	Back	FFPE_5XD_2B3L	30	31.2	1.04	1533.31	288.06	80.83	1834.32	303.509	83.753	3.62385	917.161	101.17	27.9177	129.087	1046.25	0.123381	0.0266836	0.0966974
2022-10-18	Back	Back	FFPE_5XD_2B1R	30	37.7	1.25667	896.98	179.35	60.45	1073.07	188.968	62.636	3.01693	536.535	62.9895	20.8787	83.8682	620.404	0.135183	0.0336534	0.10153
2022-10-18	Back	Back	FFPE_5XD_2B2R	30	45.5	1.51667	1011.96	193	65.63	1210.62	203.351	68.0033	2.9903	605.312	67.7835	22.6678	90.4513	695.763	0.130003	0.0325797	0.0974233
2022-10-18	Back	Back	FFPE_5XD_2B3R	30	46.54	1.55133	991.52	192.34	67.69	1186.17	202.655	70.1378	2.88939	593.085	67.5517	23.3793	90.931	684.016	0.132937	0.0341794	0.0987575
			Back_ALL		31.0375	1.03458	1148.2	217.051	65.1625	1373.6	228.692	67.5189	3.39717	686.802	76.2306	22.5063	98.7369	785.539	0.126393	0.0290309	0.0973622
					12.4323	0.414409	367.281	65.0387	17.0878	439.384	68.5267	17.7057	0.376752	219.692	22.8422	5.9019	28.4301	247.868	0.0058871	0.00385537	0.0023564
2022-10-07	Antler	Antler	FFPE_5XD_8A1L	20	42.12	2.106	1673.39	89.63	97.34	2001.9	94.4368	100.86	0.936316	1000.95	31.4789	33.62	65.0989	1066.05	0.0610656	0.031537	0.0295286
2022-10-07	Antler	Antler	FFPE_5XD_8A2L	20	28.73	1.4365	1054.6	59.66	64.65	1261.63	62.8596	66.9879	0.938372	630.817	20.9532	22.3293	43.2825	674.1	0.0642078	0.0331246	0.0310832
2022-10-07	Antler	Antler	FFPE_5XD_8A3L	20	31.07	1.5535	1141.63	64.46	68.09	1365.75	67.917	70.5523	0.962648	682.875	22.639	23.5174	46.1564	729.031	0.063312	0.0322585	0.0310535
2022-10-07	Antler	Antler	FFPE_5XD_10A1L	20	35.36	1.768	1195.47	66.41	72.98	1430.16	69.9716	75.6191	0.925316	715.08	23.3239	25.2064	48.5302	763.61	0.0635537	0.0330095	0.0305442
2022-10-07	Antler	Antler	FFPE_5XD_10A2L	20	1.3	0.065	89.49	5.44	6.04	107.058	5.73175	6.25842	0.915846	53.5291	1.91058	2.08614	3.99672	57.5259	0.069477	0.0362644	0.0332126
2022-10-07	Antler	Antler	FFPE_5XD_10A3L	20	34.45	1.7225	1218.74	68.88	72.82	1458	72.574	75.4533	0.96184	728.999	24.1913	25.1511	49.3424	778.341	0.0633944	0.0323137	0.0310806
2022-10-18	Antler	Antler	FFPE_5XD_8A1R	20	46.8	2.34	832.75	45.31	52.39	996.232	47.74	54.2845	0.87944	498.116	15.9133	18.0948	34.0082	532.124	0.0639102	0.0340049	0.0299053
2022-10-18	Antler	Antler	FFPE_5XD_8A2R	20	27.04	1.352	531.57	27.65	32.17	635.925	29.1329	33.3333	0.873986	317.963	9.71095	11.1111	20.8221	338.785	0.061461	0.032797	0.0286641
2022-10-18	Antler	Antler	FFPE_5XD_8A3R	20	32.76	1.638	601.47	31.47	36.3	719.548	33.1577	37.6127	0.881557	359.774	11.0526	12.5376	23.5901	383.364	0.0615346	0.0327041	0.0288305
2022-10-18	Antler	Antler	FFPE_5XD_10A3R	20	34.58	1.729	661.52	32.91	40.62	791.387	34.675	42.0889	0.82385	395.693	11.5583	14.0296	25.588	421.281	0.0607384	0.0333023	0.0274361
			Antler_ALL		31.421	1.57105	900.063	49.182	54.34	1076.76	51.8196	56.305	0.909917	538.38	17.2732	18.7683	36.0416	574.421	0.0632655	0.0331316	0.0301339
					12.1165	0.605823	448.764	25.0212	26.1941	536.863	26.3631	27.1414	0.0443309	268.431	8.78769	9.04713	17.8229	286.233	0.00252687	0.00128625	0.00162774
2022-11-24	Lung	Lung - Non IPF	FFPE_HBE95	47.9	54.04	1.12818	606.381	59.448	210.765	725.423	62.6362	218.387	0.286813	362.711	20.8787	72.7956	93.6743	456.386	0.205252	0.159504	0.045748
2022-11-29	Lung	Lung - Non IPF	FFPE_HBE95	47.9	85.4	1.78288	401.323	38.67	141.408	480.109	40.7439	146.522	0.278074	240.054	13.5813	48.8405	62.4218	302.476	0.206369	0.161469	0.0449003
		Lung - Healthy	FFPE_HBE97-1	38.1	61.88	1.62415	475.002	68.013	178.539	568.252	71.6605	184.995	0.387364	284.126	23.8868	61.6651	85.552	369.678	0.231423	0.166808	0.0646153
		Lung - Healthy	FFPE_HBE97-2	38.1	64.96	1.70499	599.37	85.443	208.746	717.036	90.0253	216.295	0.416216	358.518	30.0084	72.0982	102.107	460.624	0.22167	0.156523	0.0651473
2022-11-24	Lung	Lung - Healthy	FFPE_HBE97	38.1	87.6	2.29921	349.566	52.164	122.797	418.191	54.9615	127.238	0.43196	209.096	18.3205	42.4125	60.733	269.829	0.22508	0.157183	0.0678969
2022-11-24	Lung
2022-11-29	Lung		HBE_ALL		70.776	1.70788	486.328	60.7476	172.451	581.802	64.0055	178.687	0.360085	290.901	21.3352	59.5624	80.8976	371.799	0.217959	0.160297	0.0576615
					14.9162	0.417842	115.379	17.5031	39.5333	138.03	18.4418	40.963	0.0727244	69.0148	6.14727	13.6543	18.5923	86.9669	0.0116354	0.0041331	0.011335
		Lung - IPF	FFPE_IPF007	57.2	129.36	2.26154	1162.71	290.832	287.382	1390.97	306.429	297.774	1.02907	695.486	102.143	99.2581	201.401	896.887	0.224556	0.11067	0.113886
		Lung - IPF	FFPE_IPF007	57.2	148.1	2.58916	542.787	146.721	145.515	649.344	154.59	150.777	1.02529	324.672	51.5299	50.259	101.789	426.461	0.238683	0.117851	0.120831
		Lung - IPF	FFPE_IPF008-1	81.2	101.78	1.25345	649.296	109.518	207.345	776.763	115.391	214.843	0.537096	388.381	38.4638	71.6143	110.078	498.46	0.220837	0.143671	0.0771654
2022-11-24	Lung	Lung - IPF	FFPE_IPF008-2	81.2	99.96	1.23103	802.878	155.235	275.874	960.495	163.56	285.85	0.572189	480.248	54.5201	95.2834	149.803	630.051	0.237764	0.151231	0.0865328
2022-11-29	Lung	Lung - IPF	FFPE_IPF008	81.2	141.1	1.73768	501.043	101.008	180.464	599.405	106.425	186.99	0.569148	299.703	35.475	62.33	97.805	397.508	0.246046	0.156802	0.0892436
			IPF_ALL		124.06	1.81457	731.743	160.663	219.316	875.396	169.279	227.247	0.746557	437.698	56.4264	75.749	132.175	569.873	0.233577	0.136045	0.0975319
					22.2125	0.60437	267.638	76.391	61.0966	320.179	80.4878	63.3059	0.256541	160.09	26.8293	21.102	43.8632	203.676	0.0105209	0.0205825	0.0188069
2022-11-24	Lung
2022-11-24	Lung
2022-11-29	Lung

## Sheet: C1C3HyP_Sample
Updated 230310
	N	COL TOT (nM)	SD	COL I (nM)	SD	COL III_Hyp (nM)	SD	COL III No Hyp (nM)	SD	COL III (nM)	SD	ColIII Hyp/COL TOT (%)		ColIII No Hyp/COL TOT (%)		COL III/COL TOT (%)	SD
Back	8	785.539	247.868	686.802	219.692	22.5063	5.9019	76.2306	22.8422	98.7369	28.4301	0.0290309	0.00385537	0.0973622	0.0023564	0.126393	0.0058871
Antler	10	574.421	286.233	538.38	268.431	18.7683	9.04713	17.2732	8.78769	36.0416	17.8229	0.0331316	0.00128625	0.0301339	0.00162774	0.0632655	0.00252687
	n	COL TOT (nM)	SD	COL I (nM)	SD	COL III_Hyp (nM)	SD	COL III No Hyp (nM)	SD	COL III (nM)	SD	ColIII Hyp/COL TOT (%)		ColIII No Hyp/COL TOT (%)		COL III/COL TOT (%)	SD
HBE		371.799	86.9669	290.901	69.0148	59.5624	13.6543	21.3352	6.14727	80.8976	18.5923	0.160297	0.0041331	0.0576615	0.011335	0.217959	0.0116354
IPF		569.873	203.676	437.698	160.09	75.749	21.102	56.4264	26.8293	132.175	43.8632	0.136045	0.0205825	0.0975319	0.0188069	0.233577	0.0105209
																			P VALUE
																	Col3/total		0.0569541
																	Col3 Hyp/total		0.0566486
																	Col3 NHyp/total		0.00550045
